# Supplementary material for: Safety and Efficacy of Memantine in Children with Autism: Randomized, Placebo-Controlled Study and Open-Label Extension
Source: PubMed Central journal article supplement — J Child Adolesc Psychopharmacol. 2017 Jun 1;27(5):403–12. doi: 10.1089/cap.2015.0146 (PMC5510039; doi:10.1089/cap.2015.0146), 2017-06-01
Supplement: Supp_Figure1.pdf [file Supp_Figure1.pdf]

## Supplementary Data

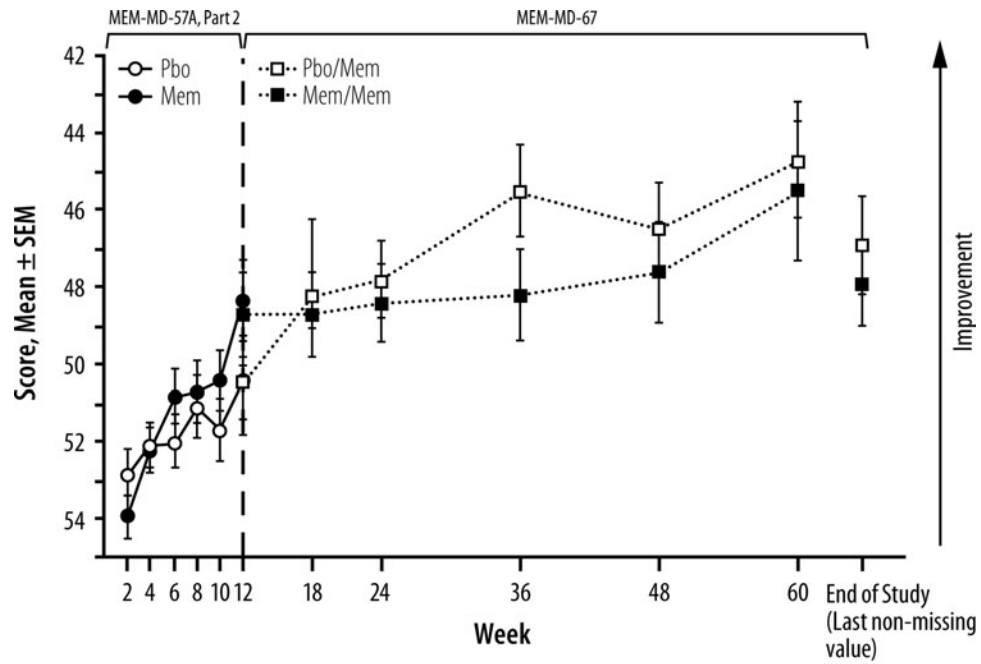

<sup>a</sup>In MEM-MD-57A Part 2 MMRM approach based on observed cases were performed, and in MEM-MD-67 only descriptive statistics were analyzed. Therefore, the presented scores are least squares means from the MMRM model for MEM-MD-57A Part 2 and ordinary means for MEM-MD-67. ITT, intention-to-treat; Mem, extended-release memantine; MMRM, mixed-effect model repeated measures; Pbo, placebo; SEM, standard error of the mean.

**SUPPLEMENTARY FIG. S1.** Post-Baseline Scores on Core Autism Treatment Scale-Improvement (CATS-I) (Autism ITT Population)<sup>a</sup>
